# Supplementary material for: Assessing the effectiveness of SO 2 , NO x , and NH 3 emission reductions in mitigating winter PM 2.5 in Taiwan using CMAQ
Source: Copernicus journal article supplement (doi:10.5194/acp-24-10759-2024), 2024-09-25
Supplement: Supplementary file 1 [file acp-24-10759-2024-supplement.pdf]

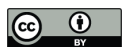

*Supplement of*

## **Assessing the effectiveness of SO<sub>2</sub>, NO<sub>x</sub>, and NH<sub>3</sub> emission reductions in mitigating winter PM<sub>2.5</sub> in Taiwan using CMAQ**

**Ping-Chieh Huang et al.**

*Correspondence to:* Hui-Ming Hung ([hmhung@ntu.edu.tw](mailto:hmhung@ntu.edu.tw))

The copyright of individual parts of the supplement might differ from the article licence.

## **Contents of this file**

Description of the relationship between  $S_{NO_x,NO_3}$  and  $NO_2$  concentration

Tables S1 to S7

Figures S1 to S14

### Relationship between $S_{NO_x,NO_3}$ and $NO_2$ concentration

The reduction in  $NO_x$  emissions leads to a decrease in  $NO_2$  concentration, subsequently reducing  $HNO_3$  production through reaction R1:

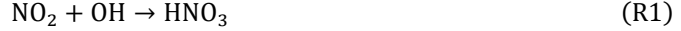

The production rate of  $HNO_3$  ( $P_{HNO_3}$ ) can be calculated by assuming that  $OH$  concentration is in the steady state as follows:

$$\frac{d[OH]}{dt} = P_r - L = P - \sum k_i[A]_i [OH] - k_{NO_2}[NO_2][OH], \quad (1)$$

where  $P_r$  and  $L$  are chemical production and loss of  $[OH]$ , respectively,  $\sum k_i[A]_i [OH]$  is the sum of reaction rates of all  $OH$ -consuming chemical reactions except reaction (R1),  $k_i$  is the rate constant of each reaction.

The steady-state  $[OH]$  is estimated as follows:

$$[OH]_{SS} = \frac{P_r}{\sum k_i[A]_i + k_{NO_2}[NO_2]} \quad (2)$$

Thus, the production rate of  $HNO_3$  is:

$$P_{HNO_3} = k_{NO_2}[NO_2][OH]_{SS} = \frac{P_r \times k_{NO_2}[NO_2]}{\sum k_i[A]_i + k_{NO_2}[NO_2]} \quad (3)$$

The total  $[HNO_3]$  is contributed by the chemical process ( $[HNO_3]_{chem}$ ) at a time frame of  $\Delta t$  and transported from outside the domain boundaries ( $[HNO_3]_{trans}$ ) as follows:

$$[HNO_3] = [HNO_3]_{chem} + [HNO_3]_{trans} = \frac{P_r \times k_{NO_2}[NO_2]\Delta t}{\sum k_i[A]_i + k_{NO_2}[NO_2]} + [HNO_3]_{trans} \quad (4)$$

When  $[NO_2]$  is sufficiently low,  $[HNO_3]_{trans}$  becomes comparable with  $[HNO_3]_{chem}$  to affect the total  $[HNO_3]$ . Assuming  $[NO_2]$  is proportional to the emission ratio ( $Er$ ), we have  $[NO_2] = [NO_2]_{control\_run} \times Er$ . With the assumptions of  $P_r \times \Delta t = 3$  and  $\sum k_i[A]_i : k_{NO_2}[NO_2]_{control\_run} = 7 : 5$ , the influence of transport term on the sensitivity,  $S_{NO_x,NO_3}$  can be evaluated. Figure S14 shows  $HNO_3$  concentration and  $S_{NO_x,NO_3}$  under conditions with  $[HNO_3]_{trans} = 0, 0.2, \text{ and } 0.53$ , representing no transported  $HNO_3$ , transported  $HNO_3$  equal to  $[HNO_3]_{chem}$  at  $NO_2 = 0.1$  and at  $NO_2 = 0.3$ , respectively.  $HNO_3$  increases as  $Er$  increases, but the increase gradually slows down. Variations in transported  $HNO_3$  do not alter the overall pattern of total  $HNO_3$  but do introduce differences in values (Fig. S14a). However, the trend of  $S_{NO_x,NO_3}$  is different (Fig. S14b). Without transported  $HNO_3$ ,  $S_{NO_x,NO_3}$  increases as  $Er$  decreases. Conversely, when  $[HNO_3]_{trans}$  is greater than 0,  $S_{NO_x,NO_3}$  shows a transition point occurring at  $Er$ , corresponding to  $[HNO_3]_{chem}$  similar to  $[HNO_3]_{trans}$ . The scatter plot of  $S_{NO_x,NO_3}$ , calculated from six

discrete points with an interval of 0.2 to mimic the CMAQ simulation, shows a similar trend under the influence of non-zero  $[\text{HNO}_3]_{\text{trans}}$ .

**Table S1: WRF-CMAQ model setting.**

|                              | <b>Parameters</b>           | <b>Setting</b>                  |
|------------------------------|-----------------------------|---------------------------------|
| <b>WRF</b><br><b>v3.7.1</b>  | Microphysics                | WSM 5-class scheme              |
|                              | Cumulus Parameterization    | Kain-Fritsch                    |
|                              | Planetary Boundary Layer    | YSU scheme                      |
|                              | Surface Layer               | MM5 Monin-Obukhov scheme        |
|                              | Land Surface                | Unified Noah land-surface model |
|                              | Urban Surface               | No                              |
|                              | Longwave Radiation          | cam scheme                      |
|                              | Shortwave Radiation         | cam scheme                      |
|                              | SST_update                  | Yes                             |
| <b>CMAQ</b><br><b>v5.2.1</b> | Chemical mechanism          | Cb06                            |
|                              | Horizontal advection        | Yamo                            |
|                              | Vertical advection          | WRF input                       |
|                              | Horizontal mixing/diffusion | Multiscale                      |
|                              | Aerosol                     | Aero 6                          |
|                              | Cloud option                | ACM AE6                         |
|                              | Emission                    | TEDS 9.0                        |

**Table S2: WRF-CMAQ resolution.**

|             |                       | <b>D01</b> | <b>D02</b> | <b>D03</b> | <b>D04</b> |
|-------------|-----------------------|------------|------------|------------|------------|
| <b>WRF</b>  | <b>Vertical Layer</b> | 45         | 45         | 45         | 45         |
|             | <b>Grid size</b>      | 91×91      | 166×169    | 223×223    | 223×223    |
|             | <b>FDDA</b>           | Yes        | Yes        | Yes        | No         |
| <b>CMAQ</b> | <b>Resolution</b>     | 81km       | 27km       | 9km        | 3km        |
|             | <b>Vertical Layer</b> | 6          | 15         | 15         | 15         |
|             | <b>Grid size</b>      | 70×80      | 70×80      | 70×80      | 90×135     |

**Table S3: Box model initial conditions.**

| parameter                                        | value                       | Description*                                                                                     |
|--------------------------------------------------|-----------------------------|--------------------------------------------------------------------------------------------------|
| <b>Temperature</b>                               | 291 K                       |                                                                                                  |
| <b>Cloud water</b>                               | 0.376 g kg <sup>-1</sup>    |                                                                                                  |
| <b>CO<sub>2(g)</sub></b>                         | 400 ppmv                    | Constant                                                                                         |
| <b>SO<sub>2(g)</sub></b>                         | 7.13 ppbv                   | <sup>b</sup> SO <sub>2(g)</sub> + <sup>c</sup> dH <sub>2</sub> O <sub>2</sub>                    |
| <b><sup>a</sup>H<sub>2</sub>O<sub>2(g)</sub></b> | 0.43 ppbv                   |                                                                                                  |
| <b><sup>b</sup>O<sub>3(g)</sub></b>              | 18.7 ppbv                   |                                                                                                  |
| <b>Total <sup>a</sup>NH<sub>3</sub></b>          | 73.4 ppbv × <sup>d</sup> Er | NH <sub>3(g)</sub> + NH <sub>4</sub> <sup>+</sup> (I+J+K)                                        |
| <b>Total <sup>a</sup>HNO<sub>3</sub></b>         | 12.3 ppbv                   | HNO <sub>3(g)</sub> + NO <sub>3</sub> <sup>-</sup> (I+J+K)                                       |
| <b>SO<sub>4</sub><sup>2-</sup></b>               | 0.088 μg m <sup>-3</sup>    | <sup>b</sup> SO <sub>4</sub> <sup>2-</sup> (I+J+K) – <sup>c</sup> dH <sub>2</sub> O <sub>2</sub> |
| <b><sup>a</sup>Fe<sup>3+</sup></b>               | 0.0238 μg m <sup>-3</sup>   | Fe(III) available for sulfate oxidation                                                          |
| <b><sup>a</sup>Mn<sup>2+</sup></b>               | 0.035 μg m <sup>-3</sup>    | Mn(II) available for sulfate oxidation                                                           |
| <b><sup>a</sup>Na<sup>+</sup></b>                | 0.48                        | I+J+K                                                                                            |
| <b><sup>a</sup>K<sup>+</sup></b>                 | 0.82                        | J+K                                                                                              |
| <b><sup>a</sup>Ca<sup>2+</sup></b>               | 1.38                        | J+K                                                                                              |
| <b><sup>a</sup>Mg<sup>2+</sup></b>               | 1.00                        | J+K                                                                                              |
| <b><sup>a</sup>Cl<sup>-</sup></b>                | 0.64                        | I+J+K                                                                                            |

\* I, J, K denotes Aitken, accumulation, and coarse modes in particle phase from CMAQ output.

\* Condition: a grid point along the coast of Taichung (24.203° N, 120.5053° E, the second layer, ~ 68.5 m a.s.l) at 8:00 am local time on 3<sup>rd</sup> December 2018 from CMAQ.

<sup>a</sup> The concentration from the control run.

<sup>b</sup> The concentration from the NH3\_02x run (NH<sub>3</sub> emission reduced to 0.2x of control run).

<sup>c</sup> dH<sub>2</sub>O<sub>2</sub> is the H<sub>2</sub>O<sub>2</sub> difference concentration (control run – NH3-02x run).

<sup>d</sup> Er ranges from 0.2 to 1.0 at 0.1 intervals

**Table S4: Reactions and rate constants used in the box model (from Seinfeld and Pandis (2006))**

| <b>Dissolution reaction</b>       |                                                                                                                                                                                                                                                                              | <b>Henry's constant (M atm<sup>-1</sup>)</b>                                                                         |
|-----------------------------------|------------------------------------------------------------------------------------------------------------------------------------------------------------------------------------------------------------------------------------------------------------------------------|----------------------------------------------------------------------------------------------------------------------|
| 1.                                | $\text{CO}_2 + \text{H}_2\text{O} \leftrightarrow \text{CO}_2 \cdot \text{H}_2\text{O}$                                                                                                                                                                                      | $H_{\text{CO}_2} = 0.034$                                                                                            |
| 2.                                | $\text{SO}_2 + \text{H}_2\text{O} \leftrightarrow \text{SO}_2 \cdot \text{H}_2\text{O}$                                                                                                                                                                                      | $H_{\text{SO}_2} = 1.23$                                                                                             |
| 3.                                | $\text{HNO}_3(\text{g}) \leftrightarrow \text{HNO}_3(\text{aq})$                                                                                                                                                                                                             | $H_{\text{HNO}_3} = 2.1 \times 10^5$                                                                                 |
| 4.                                | $\text{NH}_3 + \text{H}_2\text{O} \leftrightarrow \text{NH}_3 \cdot \text{H}_2\text{O}$                                                                                                                                                                                      | $H_{\text{NH}_3} = 62$                                                                                               |
| 5.                                | $\text{O}_3(\text{g}) \leftrightarrow \text{O}_3(\text{aq})$                                                                                                                                                                                                                 | $H_{\text{O}_3} = 1.14 \times 10^{-2}$                                                                               |
| 6.                                | $\text{H}_2\text{O}_2(\text{g}) \leftrightarrow \text{H}_2\text{O}_2(\text{aq})$                                                                                                                                                                                             | $H_{\text{H}_2\text{O}_2} = 1 \times 10^5$                                                                           |
| <b>Dissociation reaction</b>      |                                                                                                                                                                                                                                                                              | <b>Rate constant (M)</b>                                                                                             |
| 7.                                | $\text{CO}_2 \cdot \text{H}_2\text{O} \leftrightarrow \text{HCO}_3^- + \text{H}^+$<br>$\text{HCO}_3^- \leftrightarrow \text{CO}_3^{2-} + \text{H}^+$                                                                                                                         | $k_{c1} = 4.2 \times 10^{-7}$<br>$k_{c2} = 5.61 \times 10^{-11}$                                                     |
| 8.                                | $\text{SO}_2 \cdot \text{H}_2\text{O} \leftrightarrow \text{HSO}_3^- + \text{H}^+$<br>$\text{HSO}_3^- \leftrightarrow \text{SO}_3^{2-} + \text{H}^+$                                                                                                                         | $k_{s1} = 1.3 \times 10^{-2}$<br>$k_{s2} = 6.6 \times 10^{-8}$                                                       |
| 9.                                | $\text{HNO}_3(\text{aq}) \leftrightarrow \text{NO}_3^- + \text{H}^+$                                                                                                                                                                                                         | $k_{a1} = 15.4$                                                                                                      |
| 10.                               | $\text{NH}_3 \cdot \text{H}_2\text{O} \leftrightarrow \text{NH}_4^+ + \text{OH}^-$                                                                                                                                                                                           | $k_{a1} = 1.7 \times 10^{-5}$                                                                                        |
| 11.                               | $\text{H}_2\text{SO}_4 \leftrightarrow \text{HSO}_4^- + \text{H}^+$<br>$\text{HSO}_4^- \leftrightarrow \text{SO}_4^{2-} + \text{H}^+$                                                                                                                                        | as a complete dissociation<br>$k_{a2} = 1.2 \times 10^{-2}$                                                          |
| 12.                               | $\text{H}_2\text{O} \leftrightarrow \text{H}^+ + \text{OH}^-$                                                                                                                                                                                                                |                                                                                                                      |
| <b>Aqueous oxidation reaction</b> |                                                                                                                                                                                                                                                                              | <b>Rate constant (M<sup>-1</sup>s<sup>-1</sup>)</b>                                                                  |
| 13.                               | $\text{SO}_2 + \text{O}_3 + \text{H}_2\text{O} \rightarrow \text{SO}_4^{2-} + \text{O}_2 + 2\text{H}^+$<br>$\text{HSO}_3^- + \text{O}_3 \rightarrow \text{SO}_4^{2-} + \text{O}_2 + \text{H}^+$<br>$\text{SO}_3^{2-} + \text{O}_3 \rightarrow \text{SO}_4^{2-} + \text{O}_2$ | $k_{\text{O}_3,1} = 2.4 \times 10^4$<br>$k_{\text{O}_3,2} = 3.7 \times 10^5$<br>$k_{\text{O}_3,2} = 1.5 \times 10^9$ |
| 14.                               | $\text{HSO}_3^- + \text{H}_2\text{O}_2 + \text{H}^+ \rightarrow \text{SO}_4^{2-} + 2\text{H}^+ + \text{H}_2\text{O}$                                                                                                                                                         | $k_{\text{H}_2\text{O}_2} = 7.45 \times 10^7$                                                                        |
| 15.                               | $\text{S(IV)} + \frac{1}{2} \text{O}_2 \xrightarrow{\text{Mn}^{2+}, \text{Fe}^{3+}} \text{S(VI)}$                                                                                                                                                                            | $k_{\text{Mn}} = 750; k_{\text{Fe}} = 2600;$<br>$k_{\text{Mn,Fe}} = 1.0 \times 10^{10}$                              |



**Table S5: Statistics of air temperature, relative humidity, CO, and O<sub>3</sub> of MOENV observation and model simulation results.**

|                               | <b>Tamsui</b> | <b>Shalu</b> | <b>Taixi</b> | <b>Qianzhen</b> |
|-------------------------------|---------------|--------------|--------------|-----------------|
| <b>Temperature (degree C)</b> |               |              |              |                 |
| Mean value of MOENV           | 18.61         | 20.19        | 20.00        | 23.31           |
| Mean value of WRF             | 18.48         | 19.50        | 19.05        | 22.39           |
| Correlation coefficient       | 0.87          | 0.93         | 0.84         | 0.93            |
| Mean bias error               | -0.18         | -0.69        | -0.95        | -0.92           |
| Mean absolute error           | 1.33          | 1.10         | 1.47         | 1.34            |
| <b>RH (%)</b>                 |               |              |              |                 |
| Mean value of MOENV           | 85.12         | 74.97        | 82.85        | 69.49           |
| Mean value of WRF             | 80.42         | 76.49        | 80.71        | 69.95           |
| Correlation coefficient       | 0.71          | 0.84         | 0.58         | 0.86            |
| Mean bias error               | -4.23         | 1.52         | -2.14        | 0.46            |
| Mean absolute error           | 7.31          | 6.23         | 6.75         | 4.78            |
| <b>CO (ppbv)</b>              |               |              |              |                 |
| Mean value of MOENV           | 331.98        | 355.42       | 258.98       | 644.20          |
| Mean value of CMAQ            | 137.84        | 143.09       | 129.03       | 266.13          |
| Correlation coefficient       | 0.59          | 0.53         | 0.46         | 0.62            |
| Mean bias error               | -194.05       | -212.32      | -129.94      | -377.72         |
| Mean absolute error           | 196.13        | 212.32       | 130.95       | 378.77          |
| <b>O<sub>3</sub> (ppbv)</b>   |               |              |              |                 |
| Mean value of MOENV           | 35.05         | 31.43        | 37.74        | 26.77           |
| Mean value of CMAQ            | 47.13         | 42.73        | 42.57        | 32.51           |
| Correlation coefficient       | 0.66          | 0.73         | 0.58         | 0.84            |
| Mean bias error               | 12.07         | 11.29        | 4.67         | 5.76            |
| Mean absolute error           | 13.0          | 12.93        | 8.94         | 11.05           |

$$\text{Correlation coefficient} = \frac{\sum_{i=1}^n (m_i - \bar{m})(o_i - \bar{o})}{\sqrt{\sum_{i=1}^n (m_i - \bar{m})^2} \sqrt{\sum_{i=1}^n (o_i - \bar{o})^2}}$$

$$\text{Mean bias error} = \overline{(m_i - o_i)}; \text{Mean absolute error} = \overline{|(m_i - o_i)|}$$

where  $m_i$  and  $o_i$  are the wind speed or concentrations of model and observation at time  $i$ , respectively, and  $\bar{m}$  and  $\bar{o}$  are their average over December 2018.

**Table S6: Mean contribution of sulfate formation in each air pollution zone (elevation below 200 m a.s.l.).**

|                   | <b>Gas phase processes</b> | <b>Aqueous phase processes</b> | <b>Other processes</b> |
|-------------------|----------------------------|--------------------------------|------------------------|
| northern Taiwan   | 8.4%                       | 21.5%                          | 70.1%                  |
| Chu-Miao area     | 11.2%                      | 28.5%                          | 60.3%                  |
| central Taiwan    | 13.2%                      | 30.5%                          | 56.3%                  |
| Yun-Chia-Nan area | 16.5%                      | 27.6%                          | 55.9%                  |
| Kao-Ping area     | 19.8%                      | 23.7%                          | 56.6%                  |

**Table S7: Statistics of the sensitivity of emission reductions on PM<sub>2.5</sub> concentration for NO<sub>x</sub> ( $S_{NO_x,PM_{2.5}}$ ) and NH<sub>3</sub> ( $S_{NH_3,PM_{2.5}}$ ) in each air pollution zone (elevation below 200 m a.s.l.) under current conditions (at NO<sub>x</sub> emission ratio of 0.9).**

|                   | $S_{NO_x,PM_{2.5}}$ |      |      | $S_{NH_3,PM_{2.5}}$ |      |      |
|-------------------|---------------------|------|------|---------------------|------|------|
|                   | Mean                | Q1   | Q3   | Mean                | Q1   | Q3   |
| Northern Taiwan   | 0.15                | 0.12 | 0.19 | 0.12                | 0.11 | 0.14 |
| Chu-Miao area     | 0.20                | 0.18 | 0.22 | 0.17                | 0.16 | 0.19 |
| Central Taiwan    | 0.23                | 0.20 | 0.25 | 0.19                | 0.18 | 0.21 |
| Yun-Chia-Nan area | 0.33                | 0.30 | 0.36 | 0.19                | 0.18 | 0.20 |
| Kao-Ping area     | 0.34                | 0.31 | 0.41 | 0.19                | 0.17 | 0.21 |

Mean: arithmetic mean; Q1: 25th percentile; Q3: 75th percentile.

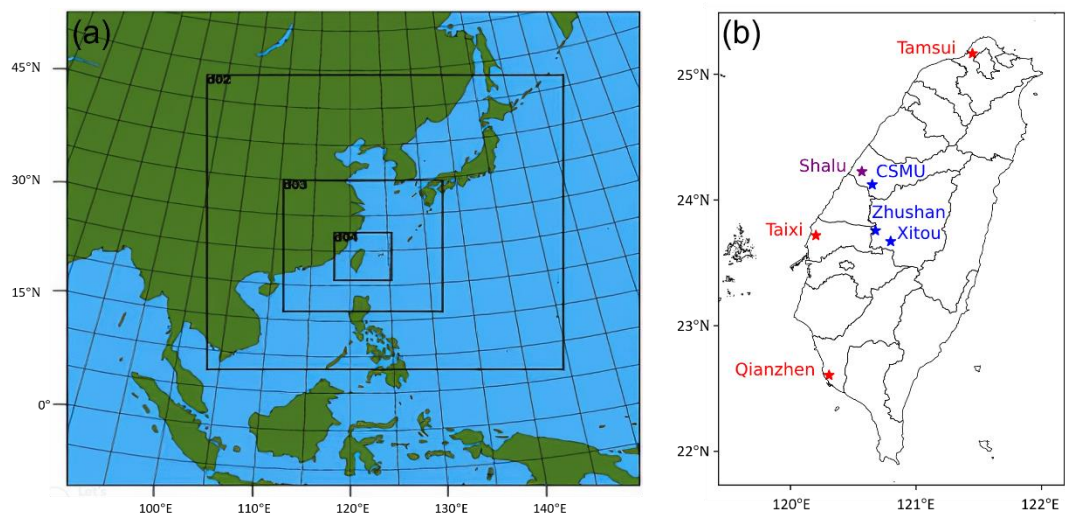

**Figure S1: (a) WPS domain configuration. (b) CMAQ d04 domain. Red points (★) are MOENV stations, blue points (★) indicate PM components measurement stations, and purple point (★) is Shalu station, having both MOENV data and PM components data.**

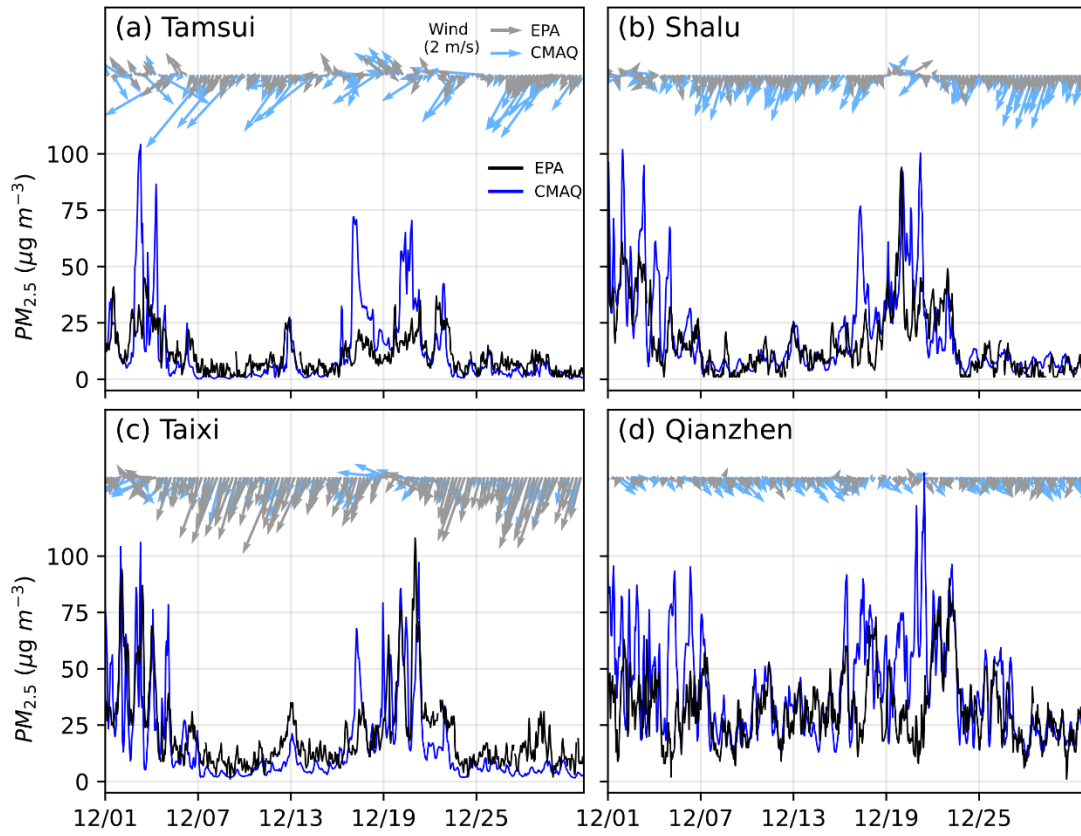

**Figure S2: The comparison of wind field and  $PM_{2.5}$  between MOENV ground observations and CMAQ surface layer data.**

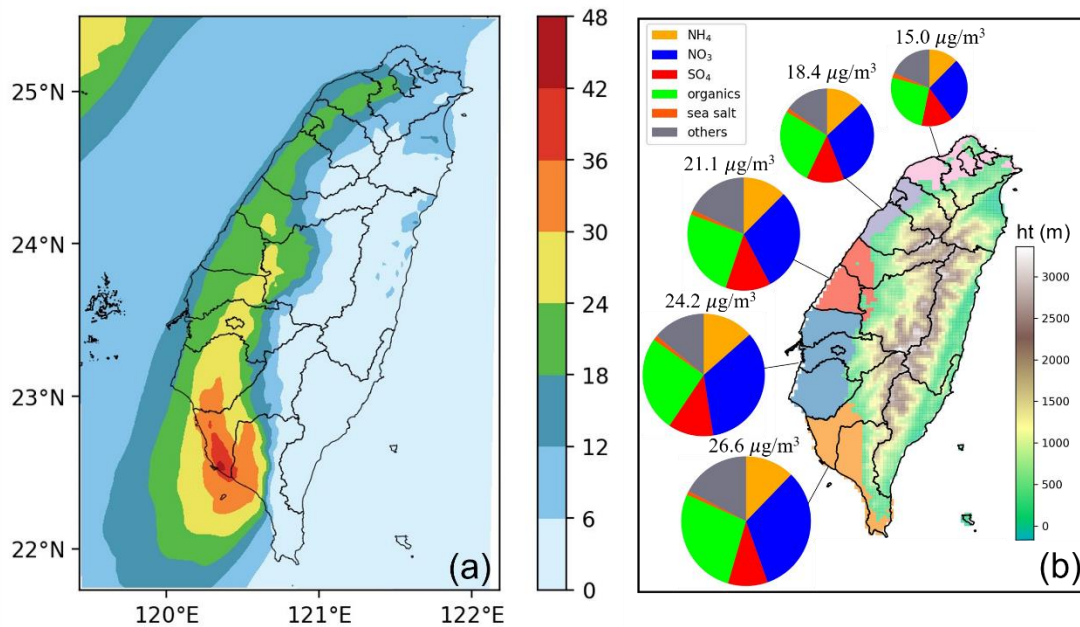

**Figure S3: Model results for (a) Average PM<sub>2.5</sub> concentration ( $\mu\text{g m}^{-3}$ ). (b) The composition fraction and PM<sub>2.5</sub> concentrations for different regions (different shading colors) for elevation less than 200 m a.s.l. (the regions from north to south are northern Taiwan (pink), Chu-Miao (purple), central Taiwan (red), Yun-Chia-Nan (blue), and Kao-Ping (orange)). The components are shown in legend. The color bar is the height above sea level. Conditions: average data for December 2018 at the surface layer.**

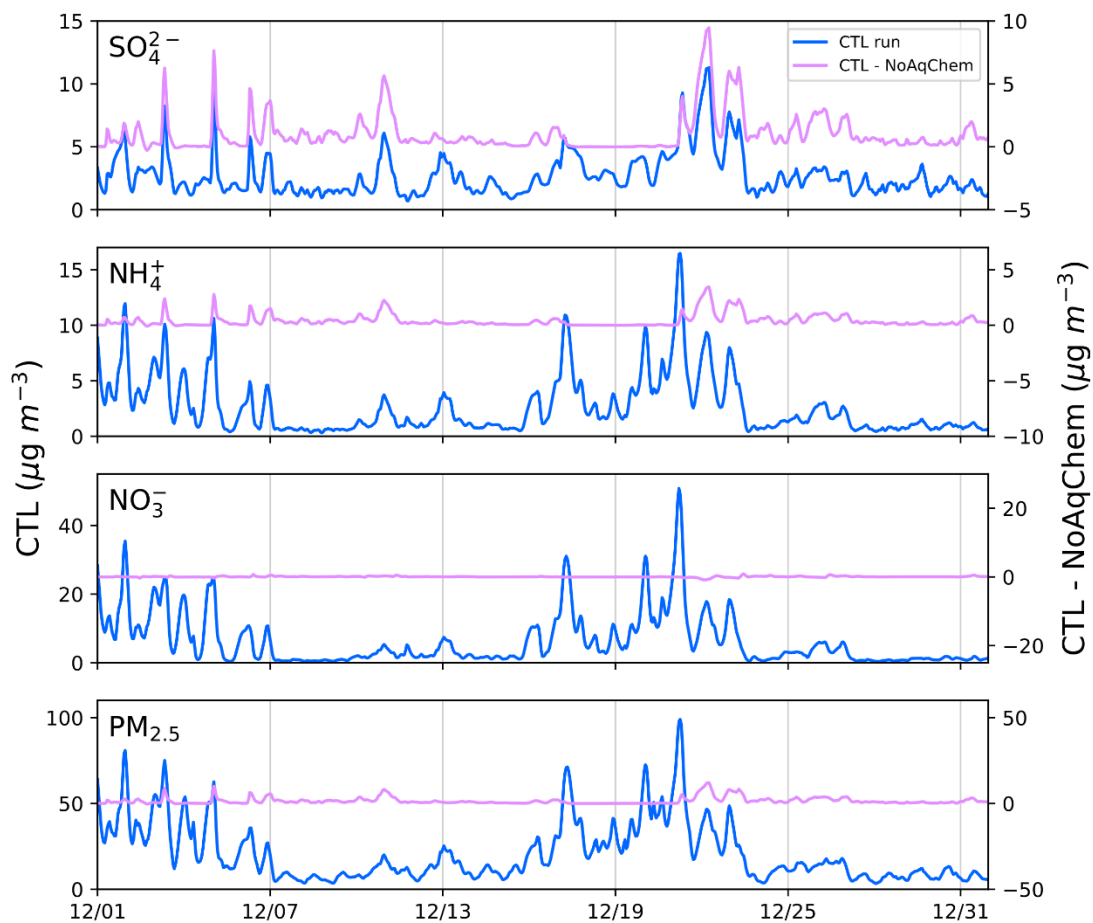

**Figure S4:** Sulfate, ammonium, nitrate, and  $\text{PM}_{2.5}$  concentrations of control run (blue line, left y-axis) and the difference between control and NoAqChem runs (pink line, right y-axis). The left and right y-axes have the same scale but different ranges. Conditions: average data for central Taiwan at the surface layer.



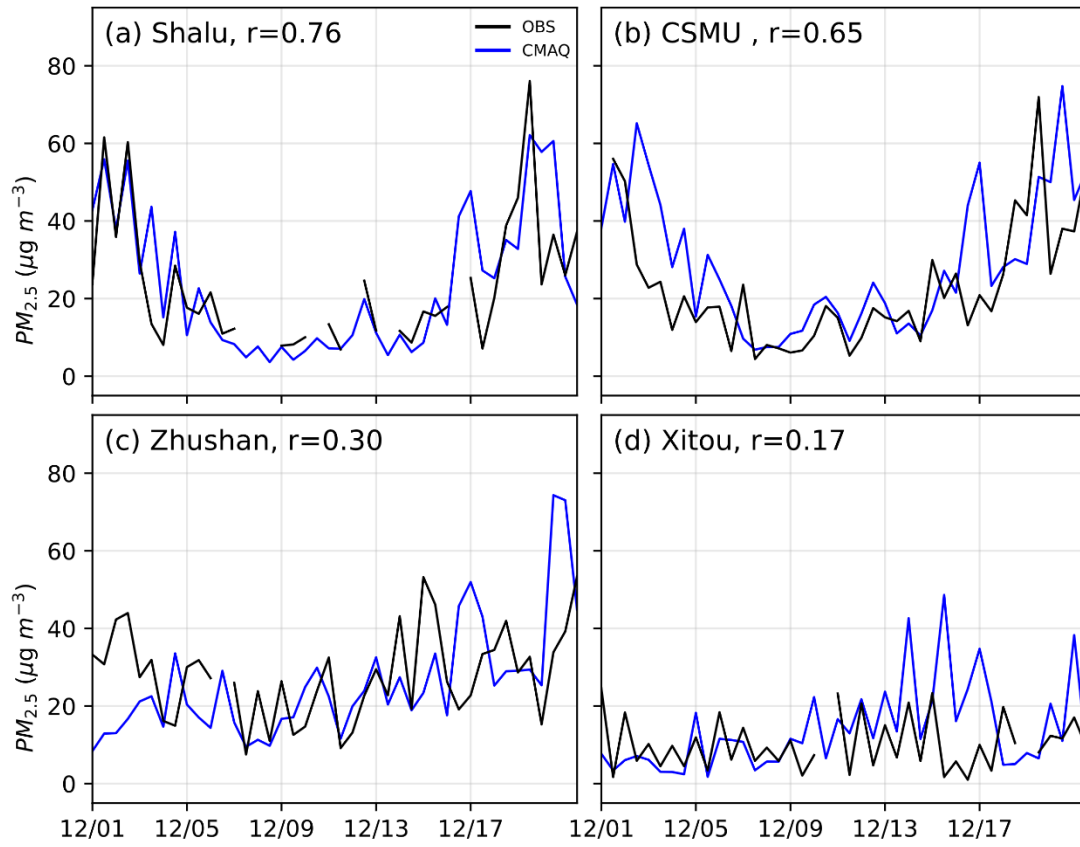

**Figure S5: The comparison of PM<sub>2.5</sub> between observation and CMAQ surface layer data in central Taiwan (r: correlation coefficient).**

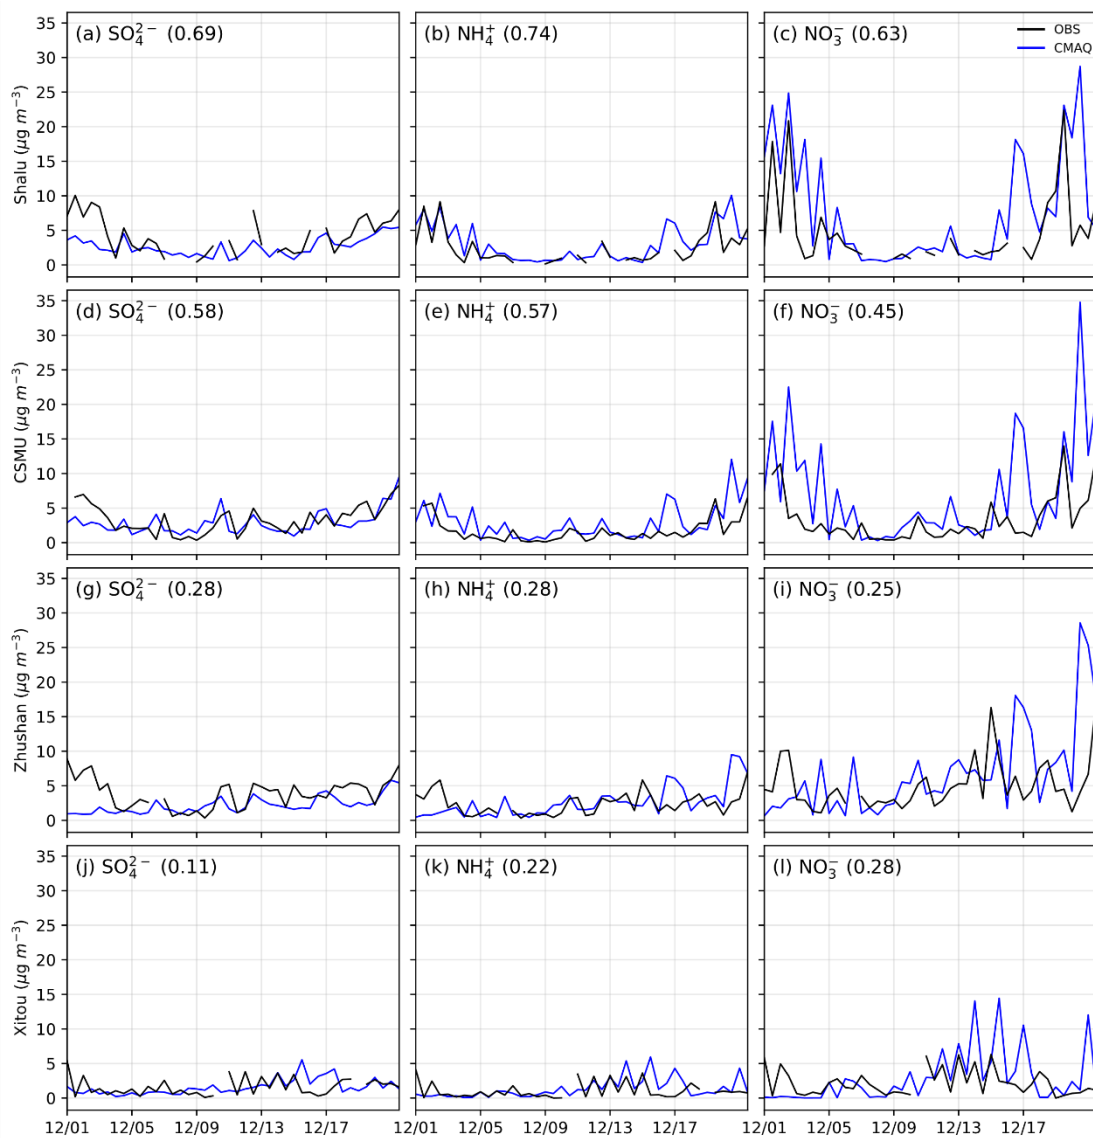

**Figure S6: The comparison of sulfate, ammonium, and nitrate between observation and CMAQ surface layer data in central Taiwan (the correlation coefficients indicated in parentheses).**

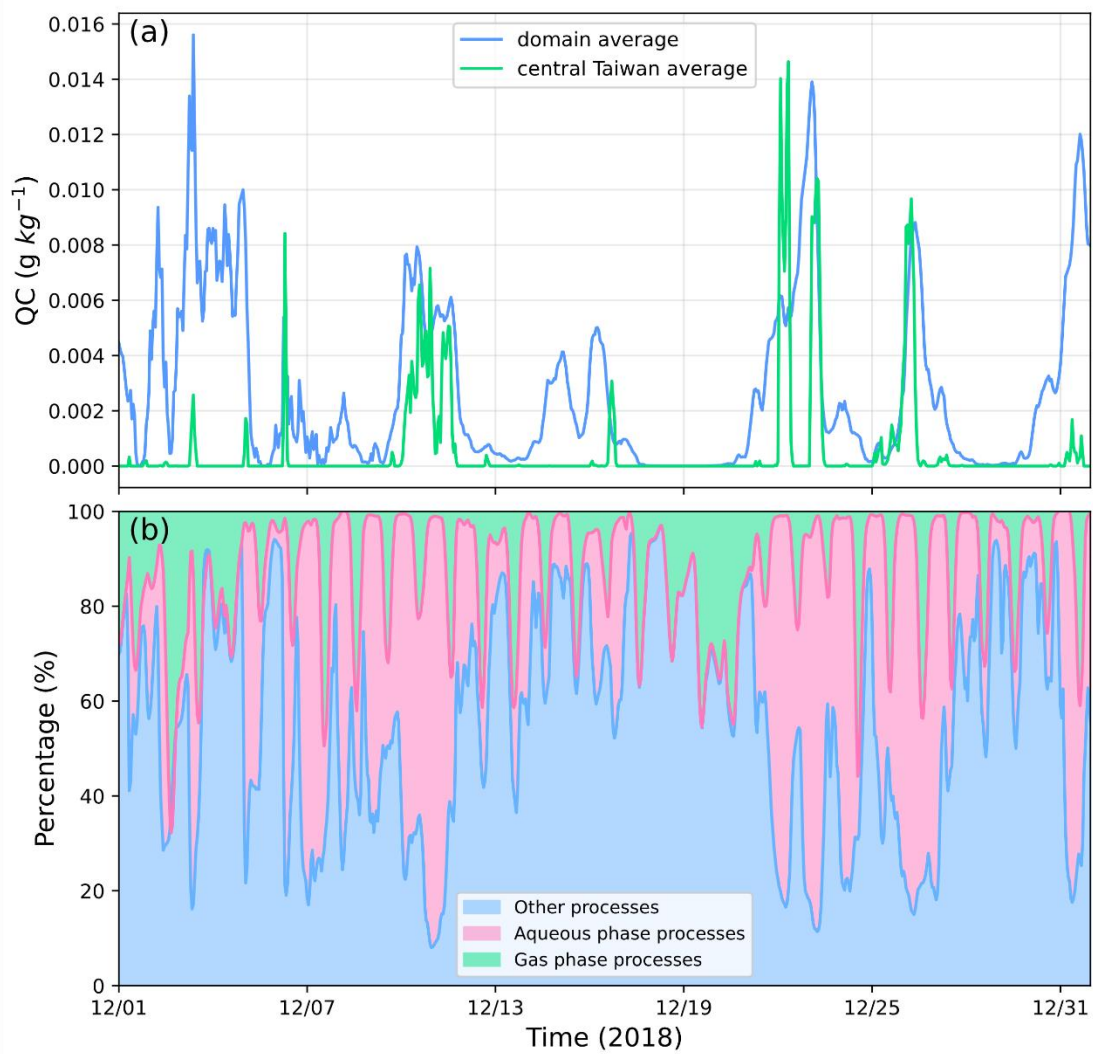

**Figure S7: (a) Average cloud water content within the planetary boundary layer. (b) Surface layer average sulfate source contributions in central Taiwan.**

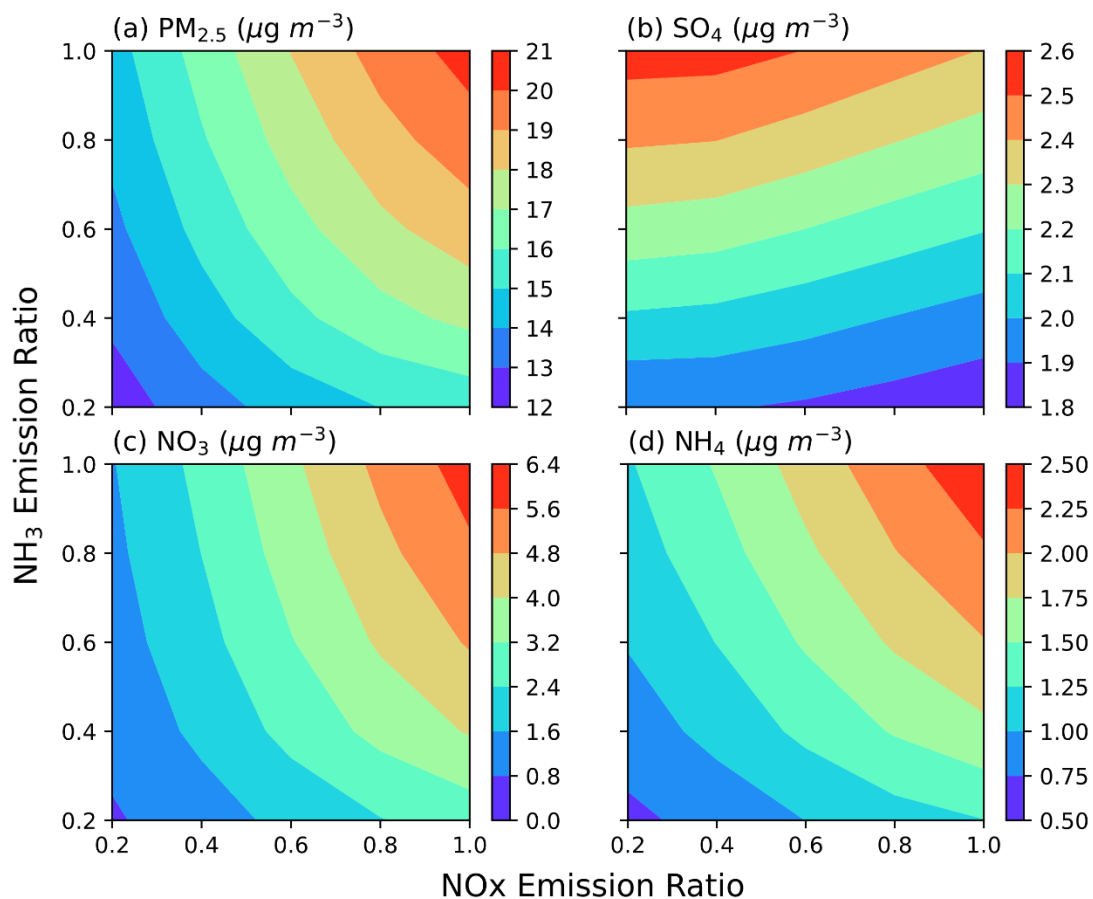

**Figure S8: (a)  $\text{PM}_{2.5}$ , (b) sulfate, (c) nitrate, and (d) ammonium average concentrations as a function of NOx (x-axis) and  $\text{NH}_3$  (y-axis) emission ratios. Conditions: average data of central Taiwan from 1<sup>st</sup> to 14<sup>th</sup> December 2018 at the surface layer.**

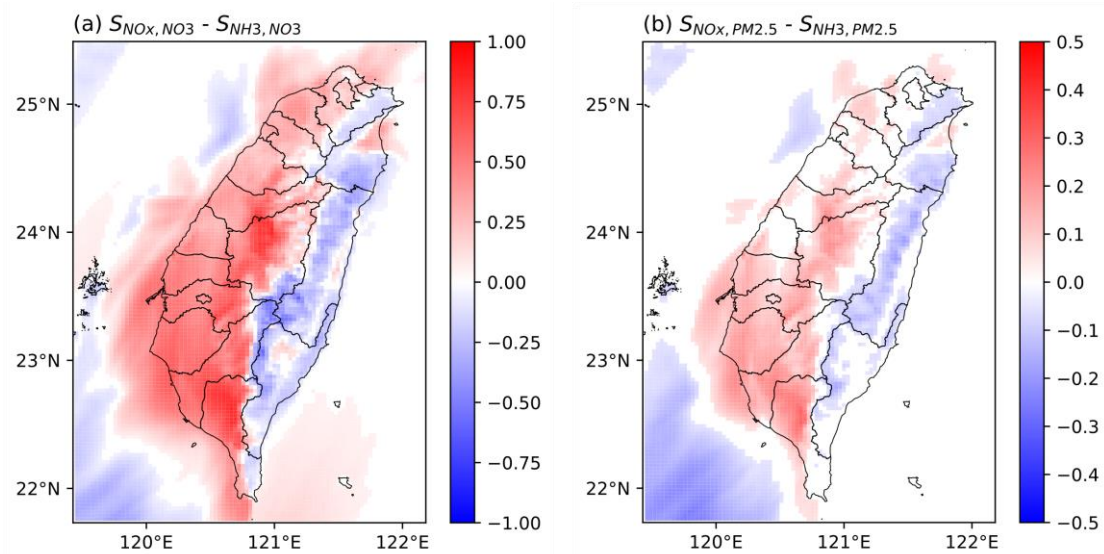

**Figure S9: The difference in sensitivity map of (a) nitrate and (b) PM<sub>2.5</sub> between NOx and NH<sub>3</sub> under the current condition (at NOx emission ratio of 0.9). Red areas (positive) represent NOx-sensitive, blue areas (negative) represent NH<sub>3</sub>-sensitive, and white areas represent neutral with values between -0.05 and 0.05. Conditions: average data for December 2018 at the surface layer.**

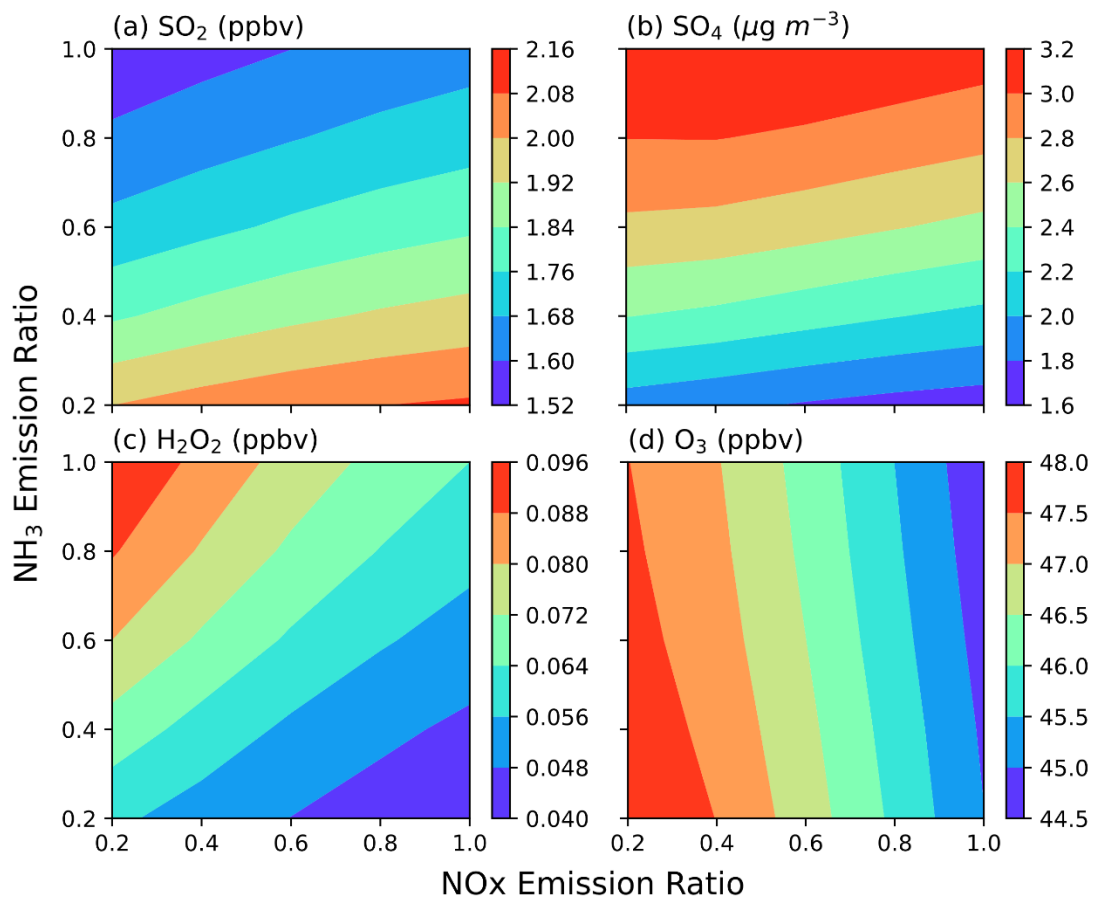

**Figure S10: Average in-cloud concentrations of (a)  $\text{SO}_2$ , (b) sulfate, (c)  $\text{H}_2\text{O}_2$ , and (d)  $\text{O}_3$  as a function of  $\text{NO}_x$  (x-axis) and  $\text{NH}_3$  (y-axis) emission ratios. Conditions: average data for the cloud grid points of western Taiwan land regions in domain 4 from 1<sup>st</sup> to 14<sup>th</sup> December 2018.**

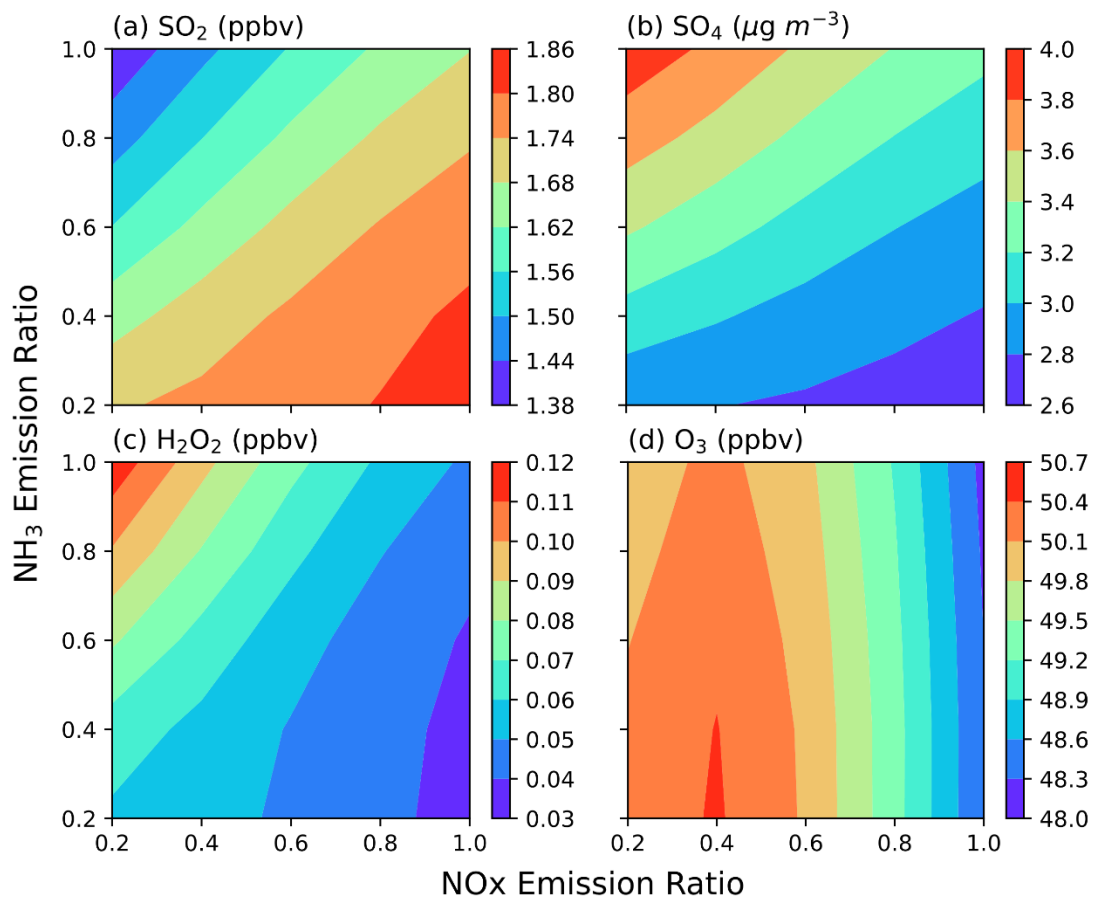

**Figure S11: Average in-cloud concentrations of (a)  $\text{SO}_2$ , (b) sulfate, (c)  $\text{H}_2\text{O}_2$ , and (d) ozone as a function of NOx (x-axis) and  $\text{NH}_3$  (y-axis) emission ratios. Conditions: average data for the cloud grid points of sea regions, west of  $121^\circ\text{E}$  in domain 4, from 1<sup>st</sup> to 14<sup>th</sup> December 2018.**

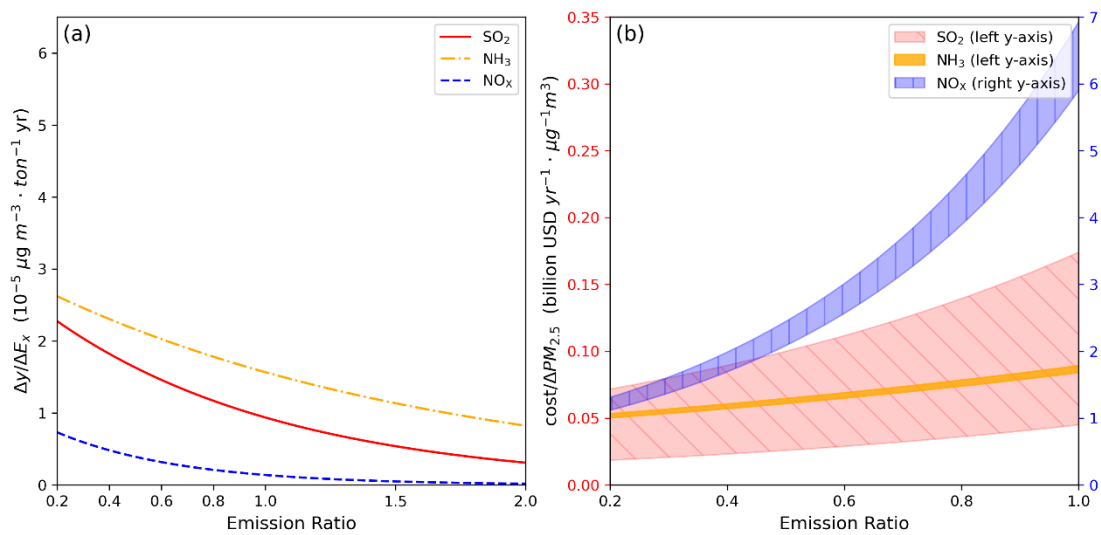

**Figure S12: (a) PM<sub>2.5</sub> reduction efficiency and (b) reduction cost as a function of emission ratio for SO<sub>2</sub>, NH<sub>3</sub>, and NO<sub>x</sub> during the clean period of 6<sup>th</sup>-12<sup>th</sup> December 2018.**



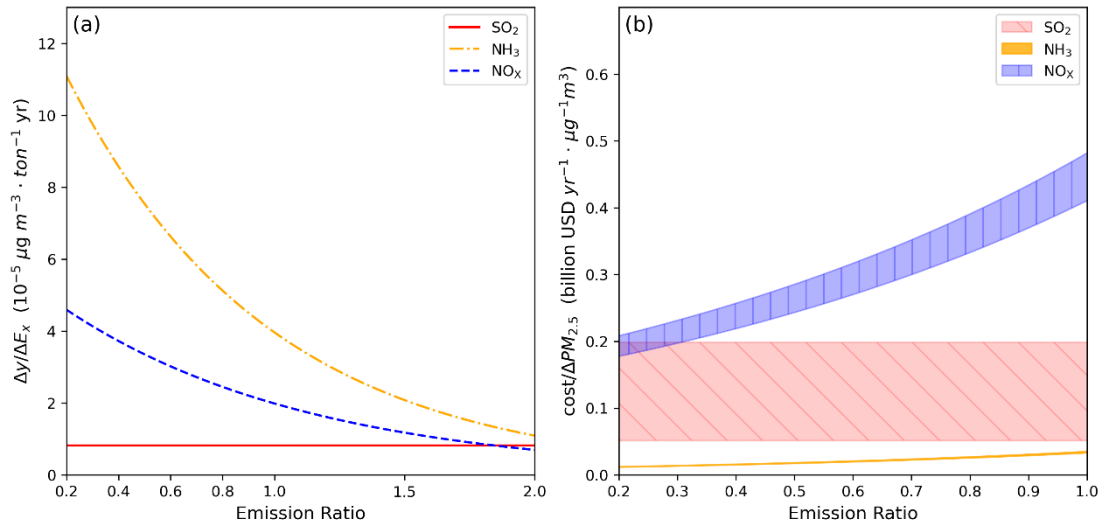

**Figure S13: (a) PM<sub>2.5</sub> reduction efficiency and (b) reduction cost as a function of emission ratio for SO<sub>2</sub>, NH<sub>3</sub>, and NO<sub>x</sub> during the high pollution period of 16<sup>th</sup>-22<sup>th</sup> December 2018.**

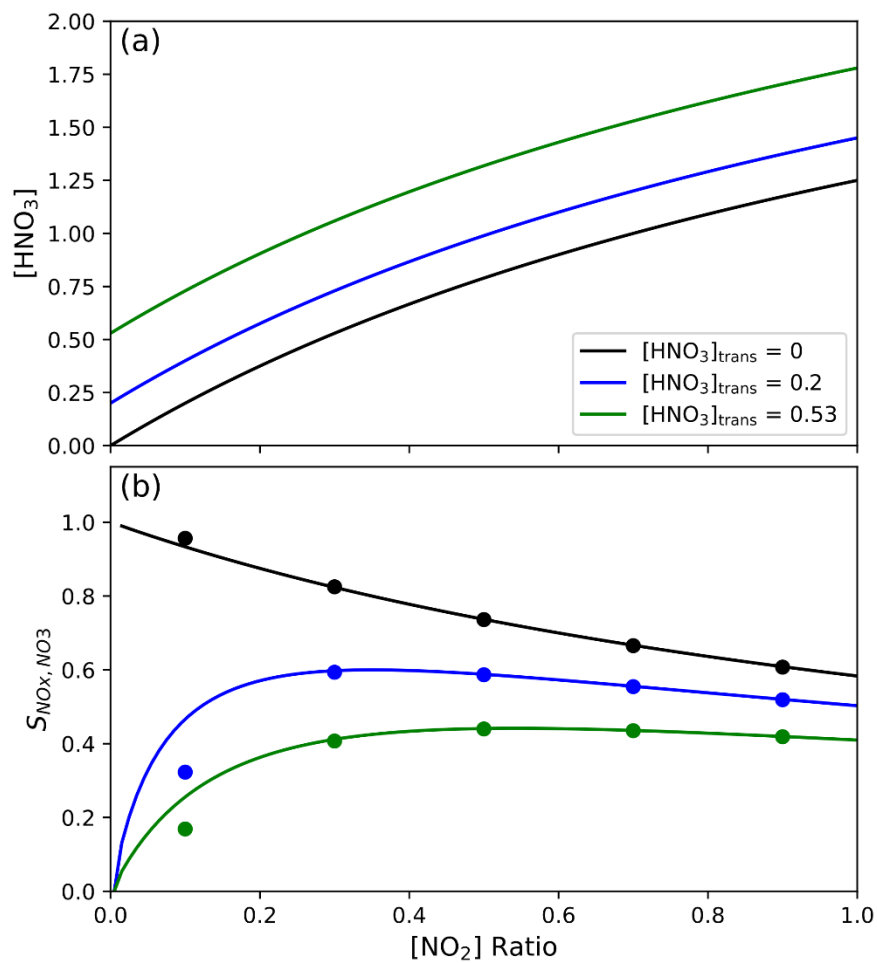

**Figure S14: (a)  $\text{HNO}_3$  concentration and (b) nitrate sensitivity coefficient of  $\text{NO}_x$  ( $S_{\text{NO}_x, \text{NO}_3}$ ) as a function of  $\text{NO}_2$  emission ratio for three conditions of  $[\text{HNO}_3]_{\text{trans}} = 0, 0.2,$  and  $0.53$ .**

**Reference**

Seinfeld, J. H., and Pandis, S. N.: Atmospheric Chemistry and Physics: From Air Pollution to Climate Change, Wiley, 2006.
